# Supplementary material
Source: Springer Nature journal article supplement (https://www.springermedizin.de/resource/supplementary/12950_2010_144_MOESM3_ESM.pdf/9558054)

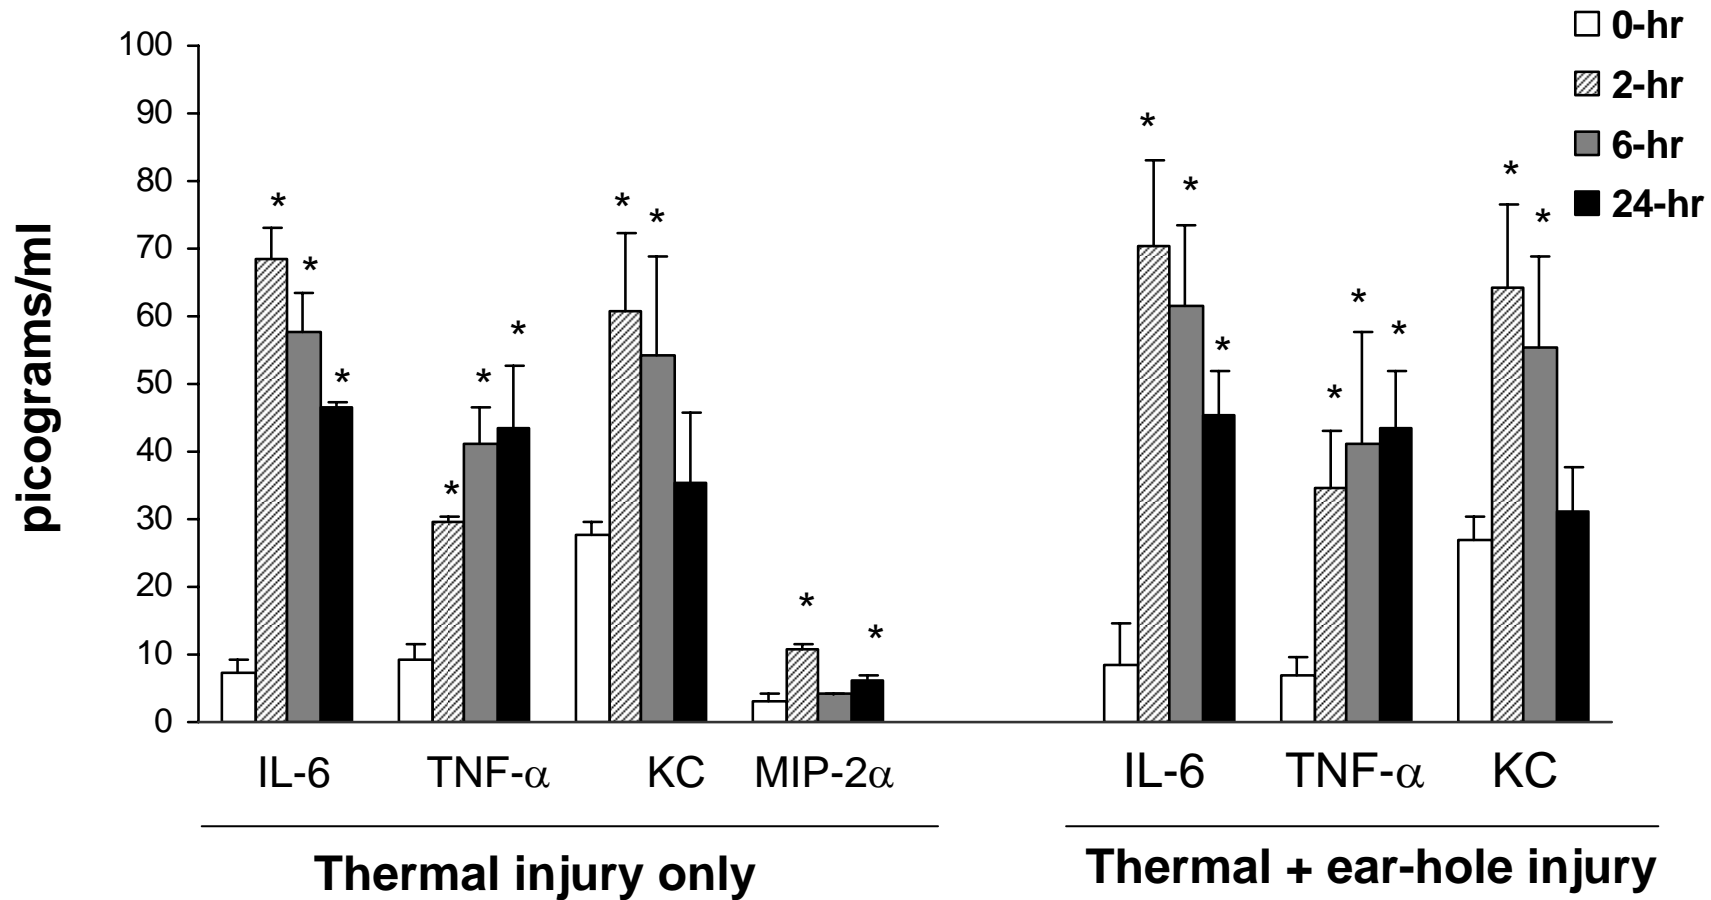

Supplement: MOESM3 [file 9558054]
